# Supplementary material for: Assessment of Immunogenic and Antigenic Properties of Recombinant Nucleocapsid Proteins of Five SARS-CoV-2 Variants in a Mouse Model
Source: MDPI journal article supplement (doi:10.3390/v15010230), 2023-01-13
Supplement: s1 [file s1]

## Supplementary Materials

**Table S1.** Amino acid substitutions between the N protein used for immunization and the N proteins of different SARS-CoV-2 strains used as antigens in ELISA.

| Immunogen           | Antigen                          |                                               |                                               |                                                            |                                                            |
|---------------------|----------------------------------|-----------------------------------------------|-----------------------------------------------|------------------------------------------------------------|------------------------------------------------------------|
|                     | B.1 (Wuhan)                      | B.1.351 (Beta)                                | P.1 (Gamma)                                   | B.1.617.2 (Delta)                                          | B.1.1.529 (Omicron)                                        |
| B.1 (Wuhan)         | -                                | P13S, T205I                                   | P80R, R203K, G204R                            | D63G, R203M, G215C, D377Y, R385K                           | P13L, ERS31-33del, R203K, G204R                            |
| B.1.351 (Beta)      | S13P, I205T                      | -                                             | S13P, P80R, R203K, G204R, I205T               | S13P, D63G, R203M, I205T, G215C, D377Y, R385K              | S13L, ERS31-33del, R203K, G204R, I205T                     |
| P.1 (Gamma)         | R80P, K203R, R204G               | P13S, R80P, K203R, R204G, T205I               | -                                             | D63G, R80P, K203M, R204G, G215C, D377Y, R385K              | P13L, ERS31-33del, R80P                                    |
| B.1.617.2 (Delta)   | G63D, M203R, C215G, Y377D, K385R | P13S, G63D, M203R, T205I, C215G, Y377D, K385R | G63D, P80R, M203K, G204R, C215G, Y377D, K385R | -                                                          | P13L, ERS31-33del, G63D, M203K, G204R, C215G, Y377D, K385R |
| B.1.1.529 (Omicron) | L13P, ERS31-33ins, K203R, R204G  | L13S, ERS31-33ins, K203R, R204G, T205I        | L13P, ERS31-33ins, P80R                       | L13P, ERS31-33ins, D63G, K203M, R204G, G215C, D377Y, R385K | -                                                          |

**Table S2.** B-cell epitopes of SARS-CoV-2 N protein of B.1 (Wuhan) strain deposited in the Immune Epitope Database which contain variable amino acid residues.

| Position | IEDB ID | Epitope sequence                            | Mutation                 | Strain             | Method        | Reference |
|----------|---------|---------------------------------------------|--------------------------|--------------------|---------------|-----------|
| 1-15     | 1313173 | MSDNGPQNQRNAPRI                             | P13S, P13L               | B.1.351, B.1.1.529 | microarray    | [1,2]     |
| 1-16     | 1680361 | MSDNGPQNQRNAPRIT                            | P13S, P13L               | B.1.351, B.1.1.529 | microarray    | [3]       |
| 1-20     | 1392311 | MSDNGPQNQRNAPRITFGGP                        | P13S, P13L               | B.1.351, B.1.1.529 | ELISA         | [4]       |
| 1-39     | 1392312 | MSDNGPQNQRNAPRITFGGPS<br>DSTGSNQNNGERSGARSQ | P13S, P13L, 31-33ERS del | B.1.351, B.1.1.529 | phage display | [5]       |
| 2-17     | 1692539 | SDNGPQNQRNAPRITF                            | P13S, P13L               | B.1.351, B.1.1.529 | microarray    | [3]       |

|       |         |                       |              |                       |                      |       |
|-------|---------|-----------------------|--------------|-----------------------|----------------------|-------|
| 3-18  | 1651733 | DNGPQNQRNAPRITFG      | P13S, P13L   | B.1.351,<br>B.1.1.529 | microarray           | [3]   |
| 4-18  | 1541724 | NGPQNQRNAPRITFG       | P13S, P13L   | B.1.351,<br>B.1.1.529 | microarray           | [1]   |
| 4-19  | 1681860 | NGPQNQRNAPRITFGG      | P13S, P13L   | B.1.351,<br>B.1.1.529 | microarray           | [3]   |
| 5-16  | 1443077 | GPQNQRNAPRIT          | P13S, P13L   | B.1.351,<br>B.1.1.529 | microarray           | [6]   |
| 5-20  | 1662374 | GPQNQRNAPRITFGGP      | P13S, P13L   | B.1.351,<br>B.1.1.529 | microarray           | [3]   |
| 6-17  | 1489379 | PQNQRNAPRITF          | P13S, P13L   | B.1.351,<br>B.1.1.529 | microarray           | [6]   |
| 6-20  | 1323019 | PQNQRNAPRITFGGP       | P13S, P13L   | B.1.351,<br>B.1.1.529 | ELISA,<br>microarray | [2,7] |
| 6-21  | 1686370 | PQNQRNAPRITFGGPS      | P13S, P13L   | B.1.351,<br>B.1.1.529 | microarray           | [3]   |
| 7-18  | 1494133 | QNQRNAPRITFG          | P13S, P13L   | B.1.351,<br>B.1.1.529 | microarray           | [6]   |
| 7-21  | 2001265 | QNQRNAPRITFGGPS       | P13S, P13L   | B.1.351,<br>B.1.1.529 | microarray           | [1]   |
| 7-22  | 1387278 | QNQRNAPRITFGGPSD      | P13S, P13L   | B.1.351,<br>B.1.1.529 | microarray           | [3]   |
| 7-27  | 1387279 | QNQRNAPRITFGGPSDSTGSN | P13S, P13L   | B.1.351,<br>B.1.1.529 | microarray           | [3]   |
| 8-22  | 1392332 | NQRNAPRITFGGPSD       | P13S, P13L   | B.1.351,<br>B.1.1.529 | ELISA                | [7]   |
| 9-20  | 1494864 | QRNAPRITFGGP          | P13S, P13L   | B.1.351,<br>B.1.1.529 | microarray           | [6]   |
| 9-23  | 1313380 | QRNAPRITFGGPSDS       | P13S, P13L   | B.1.351,<br>B.1.1.529 | microarray           | [8]   |
| 9-24  | 1387377 | QRNAPRITFGGPSDST      | P13S, P13L   | B.1.351,<br>B.1.1.529 | microarray           | [3]   |
| 10-24 | 1542300 | RNAPRITFGGPSDST       | P13S, P13L   | B.1.351,<br>B.1.1.529 | microarray           | [1]   |
| 10-25 | 1387793 | RNAPRITFGGPSDSTG      | P13S, P13L   | B.1.351,<br>B.1.1.529 | microarray           | [3]   |
| 11-26 | 1385708 | NAPRITFGGPSDSTGS      | P13S, P13L   | B.1.351,<br>B.1.1.529 | microarray           | [3]   |
| 11-30 | 1392317 | NAPRITFGGPSDSTGSNQNG  | P13S, P13L   | B.1.351,<br>B.1.1.529 | ELISA                | [4]   |
| 12-27 | 1377774 | APRITFGGPSDSTGSN      | P13S, P13L   | B.1.351,<br>B.1.1.529 | microarray           | [3]   |
| 13-23 | 1343959 | PRITFGGPSDS           | P13S, P13L   | B.1.351,<br>B.1.1.529 | microarray           | [8]   |
| 13-27 | 1313309 | PRITFGGPSDSTGSN       | P13S, P13L   | B.1.351,<br>B.1.1.529 | microarray           | [1,8] |
| 13-28 | 1686445 | PRITFGGPSDSTGSNQ      | P13S, P13L   | B.1.351,<br>B.1.1.529 | microarray           | [3]   |
| 16-31 | 1697782 | TFGGPSDSTGSNQNGE      | 31E del      | B.1.1.529             | microarray           | [3]   |
| 17-32 | 1656956 | FGGPSDSTGSNQNGER      | 31-32ER del  | B.1.1.529             | microarray           | [3]   |
| 18-33 | 1661033 | GGPSDSTGSNQNGERS      | 31-33ERS del | B.1.1.529             | microarray           | [3]   |
| 18-39 | 1892918 | GGPSDSTGSNQNGERSGARSK | 31-33ERS del | B.1.1.529             | ELISA                | [9]   |

|       |         |                                             |              |           |                      |       |
|-------|---------|---------------------------------------------|--------------|-----------|----------------------|-------|
| 19-33 | 2001081 | GPSDSTGSNQNGERS                             | 31-33ERS del | B.1.1.529 | microarray           | [1]   |
| 19-34 | 1662386 | GPSDSTGSNQNGERSG                            | 31-33ERS del | B.1.1.529 | microarray           | [3]   |
| 20-35 | 1686525 | PSDSTGSNQNGERSGA                            | 31-33ERS del | B.1.1.529 | microarray           | [3]   |
| 21-36 | 1692591 | SDSTGSNQNGERSGAR                            | 31-33ERS del | B.1.1.529 | microarray           | [3]   |
| 21-40 | 1392416 | SDSTGSNQNGERSGARSKQR                        | 31-33ERS del | B.1.1.529 | ELISA                | [4]   |
| 21-59 | 1392417 | SDSTGSNQNGERSGARSKQRR<br>PQGLPNNTASWFTALTQH | 31-33ERS del | B.1.1.529 | phage display        | [5]   |
| 22-36 | 1539968 | DSTGSNQNGERSGAR                             | 31-33ERS del | B.1.1.529 | microarray           | [1]   |
| 22-37 | 1652355 | DSTGSNQNGERSGARS                            | 31-33ERS del | B.1.1.529 | microarray           | [3]   |
| 23-38 | 1695939 | STGSNQNGERSGARSK                            | 31-33ERS del | B.1.1.529 | microarray           | [3]   |
| 24-35 | 1514563 | TGSNQNGERSGA                                | 31-33ERS del | B.1.1.529 | microarray           | [6]   |
| 24-38 | 1542758 | TGSNQNGERSGARSK                             | 31-33ERS del | B.1.1.529 | ELISA                | [7]   |
| 24-39 | 1698184 | TGSNQNGERSGARSKQ                            | 31-33ERS del | B.1.1.529 | microarray           | [3]   |
| 24-44 | 1870816 | TGSNQNGERSGARSKQRRPQG                       | 31-33ERS del | B.1.1.529 | ELISA                | [10]  |
| 25-36 | 1444073 | GSNQNGERSGAR                                | 31-33ERS del | B.1.1.529 | microarray           | [6]   |
| 25-39 | 1312611 | GSNQNGERSGARSKQ                             | 31-33ERS del | B.1.1.529 | microarray           | [1]   |
| 25-40 | 1662825 | GSNQNGERSGARSKQR                            | 31-33ERS del | B.1.1.529 | microarray           | [3]   |
| 26-40 | 1542535 | SNQNGERSGARSKQR                             | 31-33ERS del | B.1.1.529 | ELISA                | [7]   |
| 26-41 | 1694848 | SNQNGERSGARSKQRR                            | 31-33ERS del | B.1.1.529 | microarray           | [3]   |
| 27-42 | 1683330 | NQNGERSGARSKQRRP                            | 31-33ERS del | B.1.1.529 | microarray           | [3]   |
| 28-42 | 1542153 | QNGERSGARSKQRRP                             | 31-33ERS del | B.1.1.529 | ELISA,<br>microarray | [1,7] |
| 28-43 | 1387259 | QNGERSGARSKQRRPQ                            | 31-33ERS del | B.1.1.529 | microarray           | [3]   |
| 28-55 | 1387260 | QNGERSGARSKQRRPQGLPNN<br>TASWFTA            | 31-33ERS del | B.1.1.529 | microarray           |       |
| 29-44 | 1385895 | NGERSGARSKQRRPQG                            | 31-33ERS del | B.1.1.529 | microarray           | [3]   |
| 30-41 | 1439579 | GERSGARSKQRR                                | 31-33ERS del | B.1.1.529 | microarray           | [6]   |
| 30-45 | 1381027 | GERSGARSKQRRPQGL                            | 31-33ERS del | B.1.1.529 | microarray           | [3]   |
| 31-45 | 1397276 | ERSGARSKQRRPQGL                             | 31-33ERS del | B.1.1.529 | microarray           | [1,2] |
| 31-46 | 1379994 | ERSGARSKQRRPQGLP                            | 31-33ERS del | B.1.1.529 | microarray           | [3]   |
| 31-50 | 1392143 | ERSGARSKQRRPQGLPNNNTA                       | 31-33ERS del | B.1.1.529 | ELISA                | [4]   |
| 32-47 | 1387915 | RSGARSKQRRPQGLPN                            | 32-33RS del  | B.1.1.529 | microarray           | [3]   |
| 33-44 | 1503974 | SGARSKQRRPQG                                | 33S del      | B.1.1.529 | microarray           | [6]   |
| 33-47 | 1313553 | SGARSKQRRPQGLPN                             | 33S del      | B.1.1.529 | microarray           | [8]   |
| 33-48 | 1388305 | SGARSKQRRPQGLPNN                            | 33S del      | B.1.1.529 | microarray           | [3]   |
| 44-63 | 2060826 | GLPNNTASWFTALTQHGKED                        | D63G         | B.1.617.2 | ELISA                | [11]  |
| 49-63 | 1313733 | TASWFTALTQHGKED                             | D63G         | B.1.617.2 | microarray           | [1]   |
| 50-64 | 1310292 | ASWFTALTQHGKEDL                             | D63G         | B.1.617.2 | ELISA                | [7]   |
| 51-66 | 1696659 | SWFTALTQHGKEDLKF                            | D63G         | B.1.617.2 | microarray           | [3]   |
| 51-70 | 1392442 | SWFTALTQHGKEDLKFPGRQ                        | D63G         | B.1.617.2 | ELISA                | [4]   |
| 52-66 | 1543345 | WFTALTQHGKEDLKF                             | D63G         | B.1.617.2 | microarray           | [1]   |
| 54-65 | 1512359 | TALTQHGKEDLK                                | D63G         | B.1.617.2 | microarray           | [6]   |
| 54-68 | 1512360 | TALTQHGKEDLKFP                              | D63G         | B.1.617.2 | microarray           | [6]   |
| 55-69 | 2000982 | ALTQHGKEDLKFP                               | D63G         | B.1.617.2 | microarray           | [1]   |
| 56-70 | 1321406 | LTQHGKEDLKFP                                | D63G         | B.1.617.2 | ELISA                | [7]   |
| 58-72 | 1542112 | QHGKEDLKFP                                  | D63G         | B.1.617.2 | microarray           | [1]   |
| 58-73 | 1687902 | QHGKEDLKFP                                  | D63G         | B.1.617.2 | microarray           | [3]   |
| 59-73 | 1334464 | HGKEDLKFP                                   | D63G         | B.1.617.2 | ELISA                | [12]  |
| 59-74 | 1664380 | HGKEDLKFP                                   | D63G         | B.1.617.2 | microarray           | [3]   |
| 60-75 | 1661476 | GKEDLKFP                                    | D63G         | B.1.617.2 | microarray           | [3]   |
| 61-76 | 1669657 | KEDLKFP                                     | D63G         | B.1.617.2 | microarray           | [3]   |
| 61-80 | 1392232 | KEDLKFP                                     | D63G         | B.1.617.2 | ELISA                | [4]   |
| 62-73 | 1426591 | EDLKFP                                      | D63G         | B.1.617.2 | microarray           | [6]   |

|         |         |                       |                               |                                             |            |      |
|---------|---------|-----------------------|-------------------------------|---------------------------------------------|------------|------|
| 62-76   | 1540035 | EDLKFRGQGVPIINT       | D63G                          | B.1.617.2                                   | ELISA      | [7]  |
| 62-77   | 1653592 | EDLKFRGQGVPIINTN      | D63G                          | B.1.617.2                                   | microarray | [3]  |
| 63-78   | 1651371 | DLKFRGQGVPIINTNS      | D63G                          | B.1.617.2                                   | microarray | [3]  |
| 65-80   | 1669963 | KFRGQGVPIINTNSSP      | P80R                          | P.1                                         | microarray | [3]  |
| 66-80   | 1316855 | FPRGQGVPIINTNSSP      | P80R                          | P.1                                         | ELISA      | [7]  |
| 66-81   | 1658360 | FPRGQGVPIINTNSSPD     | P80R                          | P.1                                         | microarray | [3]  |
| 67-81   | 2001245 | PRGQGVPIINTNSSPD      | P80R                          | P.1                                         | microarray | [1]  |
| 67-82   | 1686429 | PRGQGVPIINTNSSPDD     | P80R                          | P.1                                         | microarray | [3]  |
| 68-82   | 1542258 | RGQGVPIINTNSSPDD      | P80R                          | P.1                                         | ELISA      | [7]  |
| 68-83   | 1690210 | RGQGVPIINTNSSPDDQ     | P80R                          | P.1                                         | microarray | [3]  |
| 69-80   | 1443234 | GQGVPIINTNSSP         | P80R                          | P.1                                         | microarray | [6]  |
| 69-84   | 1662438 | GQGVPIINTNSSPDDQI     | P80R                          | P.1                                         | microarray | [3]  |
| 70-81   | 1492723 | QGVPIINTNSSPD         | P80R                          | P.1                                         | microarray | [6]  |
| 70-84   | 1542109 | QGVPIINTNSSPDDQI      | P80R                          | P.1                                         | microarray | [1]  |
| 70-85   | 1687879 | QGVPIINTNSSPDDQIG     | P80R                          | P.1                                         | microarray | [3]  |
| 71-86   | 1663542 | GVPIINTNSSPDDQIGY     | P80R                          | P.1                                         | microarray | [3]  |
| 71-90   | 1392199 | GVPIINTNSSPDDQIGYYRRA | P80R                          | P.1                                         | ELISA      | [4]  |
| 72-83   | 1527506 | VPINTNSSPDDQ          | P80R                          | P.1                                         | microarray | [6]  |
| 72-86   | 1543205 | VPINTNSSPDDQIGY       | P80R                          | P.1                                         | ELISA      | [7]  |
| 72-87   | 1705162 | VPINTNSSPDDQIGYY      | P80R                          | P.1                                         | microarray | [3]  |
| 73-84   | 1487555 | PINTNSSPDDQI          | P80R                          | P.1                                         | microarray | [6]  |
| 73-87   | 1313287 | PINTNSSPDDQIGYY       | P80R                          | P.1                                         | microarray | [1]  |
| 73-88   | 1685533 | PINTNSSPDDQIGYYR      | P80R                          | P.1                                         | microarray | [3]  |
| 74-85   | 1453361 | INTNSSPDDQIG          | P80R                          | P.1                                         | microarray | [6]  |
| 74-88   | 1540832 | INTNSSPDDQIGYYR       | P80R                          | P.1                                         | ELISA      | [7]  |
| 74-89   | 1667534 | INTNSSPDDQIGYYRR      | P80R                          | P.1                                         | microarray | [3]  |
| 75-86   | 1484451 | NTNSSPDDQIGY          | P80R                          | P.1                                         | microarray | [6]  |
| 75-89   | 1484452 | NTNSSPDDQIGYYRR       | P80R                          | P.1                                         | microarray | [6]  |
| 75-90   | 1683919 | NTNSSPDDQIGYYRRA      | P80R                          | P.1                                         | microarray | [3]  |
| 76-90   | 1542862 | TNSSPDDQIGYYRRA       | P80R                          | P.1                                         | microarray | [1]  |
| 77-91   | 1313250 | NSSPDDQIGYYRRAT       | P80R                          | P.1                                         | ELISA      | [12] |
| 78-93   | 1695669 | SSPDDQIGYYRRATRR      | P80R                          | P.1                                         | microarray | [3]  |
| 79-90   | 1507694 | SPDDQIGYYRRA          | P80R                          | P.1                                         | microarray | [6]  |
| 79-93   | 2001314 | SPDDQIGYYRRATRR       | P80R                          | P.1                                         | microarray | [1]  |
| 79-94   | 1694961 | SPDDQIGYYRRATRRI      | P80R                          | P.1                                         | microarray | [3]  |
| 80-94   | 1541910 | PDDQIGYYRRATRRI       | P80R                          | P.1                                         | ELISA      | [7]  |
| 188-203 | 1695383 | SRSRNSSRNSTPGSSR      | R203M, R203K                  | P.1,<br>B.1.617.2,<br>B.1.1.529             | microarray | [3]  |
| 189-204 | 1691371 | RSRNSSRNSTPGSSRG      | R203M, R203K,<br>G204R        | P.1,<br>B.1.617.2,<br>B.1.1.529             | microarray | [3]  |
| 190-204 | 1542569 | SRNSSRNSTPGSSRG       | R203M, R203K,<br>G204R        | P.1,<br>B.1.617.2,<br>B.1.1.529             | microarray | [1]  |
| 190-205 | 1695346 | SRNSSRNSTPGSSRGT      | R203M, R203K,<br>G204R, T205I | B.1.351,<br>P.1,<br>B.1.617.2,<br>B.1.1.529 | microarray | [3]  |
| 191-205 | 1397406 | RNSSRNSTPGSSRGT       | R203M, R203K,<br>G204R, T205I | B.1.351,<br>P.1,<br>B.1.617.2,<br>B.1.1.529 | microarray | [2]  |

|         |         |                     |                               |                                             |            |       |
|---------|---------|---------------------|-------------------------------|---------------------------------------------|------------|-------|
| 191-206 | 1690946 | RNSSRNSTPGSSRGTS    | R203M, R203K,<br>G204R, T205I | B.1.351,<br>P.1,<br>B.1.617.2,<br>B.1.1.529 | microarray | [3]   |
| 191-210 | 1392403 | RNSSRNSTPGSSRGTSARM | R203M, R203K,<br>G204R, T205I | B.1.351,<br>P.1,<br>B.1.617.2,<br>B.1.1.529 | ELISA      | [4]   |
| 192-207 | 1683686 | NSSRNSTPGSSRGTS     | R203M, R203K,<br>G204R, T205I | B.1.351,<br>P.1,<br>B.1.617.2,<br>B.1.1.529 | microarray | [3]   |
| 193-207 | 1313680 | SSRNSTPGSSRGTS      | R203M, R203K,<br>G204R, T205I | B.1.351,<br>P.1,<br>B.1.617.2,<br>B.1.1.529 | microarray | [1]   |
| 193-208 | 1695708 | SSRNSTPGSSRGTS      | R203M, R203K,<br>G204R, T205I | B.1.351,<br>P.1,<br>B.1.617.2,<br>B.1.1.529 | microarray | [3]   |
| 194-209 | 1695349 | SRNSTPGSSRGTS       | R203M, R203K,<br>G204R, T205I | B.1.351,<br>P.1,<br>B.1.617.2,<br>B.1.1.529 | microarray | [3]   |
| 195-210 | 1690951 | RNSTPGSSRGTSARM     | R203M, R203K,<br>G204R, T205I | B.1.351,<br>P.1,<br>B.1.617.2,<br>B.1.1.529 | microarray | [3]   |
| 196-210 | 1397391 | NSTPGSSRGTSARM      | R203M, R203K,<br>G204R, T205I | B.1.351,<br>P.1,<br>B.1.617.2,<br>B.1.1.529 | microarray | [1,2] |
| 196-211 | 1683723 | NSTPGSSRGTS         | R203M, R203K,<br>G204R, T205I | B.1.351,<br>P.1,<br>B.1.617.2,<br>B.1.1.529 | microarray | [3]   |
| 197-212 | 1696051 | STPGSSRGTS          | R203M, R203K,<br>G204R, T205I | B.1.351,<br>P.1,<br>B.1.617.2,<br>B.1.1.529 | microarray | [3]   |
| 198-213 | 1699690 | TPGSSRGTS           | R203M, R203K,<br>G204R, T205I | B.1.351,<br>P.1,<br>B.1.617.2,<br>B.1.1.529 | microarray | [3]   |
| 199-213 | 2001233 | PGSSRGTS            | R203M, R203K,<br>G204R, T205I | B.1.351,<br>P.1,<br>B.1.617.2,<br>B.1.1.529 | microarray | [1]   |
| 199-214 | 1685320 | PGSSRGTS            | R203M, R203K,<br>G204R, T205I | B.1.351,<br>P.1,<br>B.1.617.2,<br>B.1.1.529 | microarray | [3]   |

|         |         |                                             |                                         |                                             |               |     |
|---------|---------|---------------------------------------------|-----------------------------------------|---------------------------------------------|---------------|-----|
| 200-215 | 1662875 | GSSRGTSPARMAGNGG                            | R203M, R203K,<br>G204R, T205I,<br>G215C | B.1.351,<br>P.1,<br>B.1.617.2,<br>B.1.1.529 | microarray    | [3] |
| 201-216 | 1695698 | SSRGTSPARMAGNGGD                            | R203M, R203K,<br>G204R, T205I,<br>G215C | B.1.351,<br>P.1,<br>B.1.617.2,<br>B.1.1.529 | microarray    | [3] |
| 201-220 | 1392436 | SSRGTSPARMAGNGGDAALA                        | R203M, R203K,<br>G204R, T205I,<br>G215C | B.1.351,<br>P.1,<br>B.1.617.2,<br>B.1.1.529 | ELISA         | [4] |
| 201-239 | 1392437 | SSRGTSPARMAGNGGDAALAL<br>LLLDRLNQLESKMSGKGQ | R203M, R203K,<br>G204R, T205I,<br>G215C | B.1.351,<br>P.1,<br>B.1.617.2,<br>B.1.1.529 | phage display | [5] |
| 202-216 | 1542565 | SRGTSPARMAGNGGD                             | R203M, R203K,<br>G204R, T205I,<br>G215C | B.1.351,<br>P.1,<br>B.1.617.2,<br>B.1.1.529 | microarray    | [1] |
| 202-217 | 1695296 | SRGTSPARMAGNGGDA                            | R203M, R203K,<br>G204R, T205I,<br>G215C | B.1.351,<br>P.1,<br>B.1.617.2,<br>B.1.1.529 | microarray    | [3] |
| 203-215 | 1313679 | SSRGTSPARMAGNGG                             | R203M, R203K,<br>G204R, T205I           | B.1.351,<br>P.1,<br>B.1.617.2,<br>B.1.1.529 | microarray    | [1] |
| 203-217 | 1497839 | RGTSPARMAGNGGDA                             | R203M, R203K,<br>G204R, T205I,<br>G215C | B.1.351,<br>P.1,<br>B.1.617.2,<br>B.1.1.529 | microarray    | [6] |
| 203-218 | 1690239 | RGTSPARMAGNGGDAA                            | R203M, R203K,<br>G204R, T205I           | B.1.351,<br>P.1,<br>B.1.617.2,<br>B.1.1.529 | microarray    | [3] |
| 204-219 | 1663184 | GTSPARMAGNGGDAAL                            | G204R, T205I                            | P.1,<br>B.1.617.2,<br>B.1.1.529             | microarray    | [3] |
| 205-219 | 1313804 | TSPARMAGNGGDAAL                             | G215C                                   | B.1.617.2                                   | microarray    | [1] |
| 205-220 | 1700343 | TSPARMAGNGGDAALA                            | T205I, G215C                            | B.1.351,<br>B.1.617.2                       | microarray    | [3] |
| 206-220 | 1542543 | SPARMAGNGGDAALA                             | G215C                                   | B.1.617.2                                   | ELISA         | [7] |
| 206-221 | 1694946 | SPARMAGNGGDAALAL                            | G215C                                   | B.1.617.2                                   | microarray    | [3] |
| 208-222 | 1539579 | ARMAGNGGDAALALL                             | G215C                                   | B.1.617.2                                   | microarray    | [1] |
| 208-223 | 1377826 | ARMAGNGGDAALALLL                            | G215C                                   | B.1.617.2                                   | microarray    | [3] |
| 208-238 | 1377827 | ARMAGNGGDAALALLLLDRL<br>NQLESKMSGKG         | G215C                                   | B.1.617.2                                   | microarray    | [3] |
| 210-224 | 1541577 | MAGNGGDAALALLLL                             | G215C                                   | B.1.617.2                                   | ELISA         | [7] |
| 210-225 | 1385332 | MAGNGGDAALALLLLD                            | G215C                                   | B.1.617.2                                   | microarray    | [3] |
| 210-226 | 1475537 | MAGNGGDAALALLLLDR                           | G215C                                   | B.1.617.2                                   | microarray    | [6] |
| 211-225 | 1314288 | AGNGGDAALALLLLD                             | G215C                                   | B.1.617.2                                   | microarray    | [1] |
| 211-226 | 1377496 | AGNGGDAALALLLLDR                            | G215C                                   | B.1.617.2                                   | microarray    | [3] |

|         |         |                                                        |              |           |                      |       |
|---------|---------|--------------------------------------------------------|--------------|-----------|----------------------|-------|
| 211-230 | 1392036 | AGNGGDAALALLLLDRLNQL                                   | G215C        | B.1.617.2 | ELISA                | [4]   |
| 212-226 | 1540534 | GNGGDAALALLLLDR                                        | G215C        | B.1.617.2 | ELISA                | [7]   |
| 212-227 | 1381497 | GNGGDAALALLLLDRL                                       | G215C        | B.1.617.2 | microarray           | [3]   |
| 213-228 | 1385897 | NGGDAALALLLLDRLN                                       | G215C        | B.1.617.2 | microarray           | [3]   |
| 214-228 | 1540456 | GGDAALALLLLDRLN                                        | G215C        | B.1.617.2 | ELISA,<br>microarray | [1,7] |
| 214-229 | 1381105 | GGDAALALLLLDRLNQ                                       | G215C        | B.1.617.2 | microarray           | [3]   |
| 215-230 | 1074903 | GDAALALLLLDRLNQL                                       | G215C        | B.1.617.2 | microarray           | [3]   |
| 341-379 | 1392106 | DKDPNFKDQVILLNKHIDAYK<br>TFPPTEPKKDKKKKADET            | D377Y        | B.1.617.2 | phage display        | [5]   |
| 358-381 | 1311663 | DAYKTFFPTEPKKDKKKKADE<br>TQA                           | D377Y        | B.1.617.2 | microarray           | [13]  |
| 361-378 | 1087597 | KTFPPTEPKKDKKKKADE                                     | D377Y, R385K | B.1.617.2 | ELISA                | [14]  |
| 361-380 | 1392251 | KTFPPTEPKKDKKKKADETQ                                   | D377Y        | B.1.617.2 | ELISA                | [4]   |
| 362-377 | 1697880 | TFPPTEPKKDKKKKAD                                       | D377Y        | B.1.617.2 | microarray           | [3]   |
| 363-378 | 1658346 | FPPTEPKKDKKKKADE                                       | D377Y        | B.1.617.2 | microarray           | [3]   |
| 363-408 | 1311678 | FPPTEPKKDKKKKADETQALP<br>QRQKKQQTVTLLPAADLDDFS<br>KQLQ | D377Y, R385K | B.1.617.2 | microarray           | [13]  |
| 364-378 | 1542003 | PPTEPKKDKKKKADE                                        | D377Y        | B.1.617.2 | ELISA,<br>microarray | [1,2] |
| 364-379 | 1686290 | PPTEPKKDKKKKADET                                       | D377Y        | B.1.617.2 | microarray           | [3]   |
| 364-385 | 1870805 | PPTEPKKDKKKKADETQALPQ<br>R                             | D377Y, R385K | B.1.617.2 | ELISA                | [11]  |
| 365-391 | 1919836 | PTEPKKDKKKKADETQALPQR<br>QKKQQT                        | D377Y, R385K | B.1.617.2 | ELISA                | [10]  |
| 366-380 | 1310210 | TEPKKDKKKKADETQ                                        | D377Y        | B.1.617.2 | microarray           | [2]   |
| 366-395 | 1862494 | TEPKKDKKKKADETQALPQRQ<br>KKQQTVTLL                     | D377Y, R385K | B.1.617.2 | ELISA                | [15]  |
| 367-381 | 2001035 | EPKKDKKKKADETQA                                        | D377Y        | B.1.617.2 | microarray           | [1]   |
| 367-382 | 1655029 | EPKKDKKKKADETQAL                                       | D377Y        | B.1.617.2 | microarray           | [3]   |
| 368-382 | 1541962 | PKKDKKKKADETQAL                                        | D377Y        | B.1.617.2 | ELISA                | [7]   |
| 368-383 | 1685675 | PKKDKKKKADETQALP                                       | D377Y        | B.1.617.2 | microarray           | [3]   |
| 369-380 | 1459304 | KKDKKKKADETQ                                           | D377Y        | B.1.617.2 | microarray           | [6]   |
| 369-384 | 1670649 | KKDKKKKADETQALPQ                                       | D377Y        | B.1.617.2 | microarray           | [3]   |
| 369-386 | 1087574 | KKDKKKKADETQALPQRQ                                     | D377Y, R385K | B.1.617.2 | ELISA                | [14]  |
| 370-384 | 1540947 | KDKKKKADETQALPQ                                        | D377Y        | B.1.617.2 | ELISA,<br>microarray | [1,7] |
| 370-385 | 1457322 | KDKKKKADETQALPQR                                       | D377Y, R385K | B.1.617.2 | microarray           | [3,6] |
| 371-385 | 1310080 | DKKKKADETQALPQR                                        | D377Y, R385K | B.1.617.2 | microarray           | [2]   |
| 371-386 | 1651126 | DKKKKADETQALPQRQ                                       | D377Y, R385K | B.1.617.2 | microarray           | [3]   |
| 371-390 | 1392108 | DKKKKADETQALPQRQKKQQ                                   | D377Y, R385K | B.1.617.2 | ELISA                | [4]   |
| 372-387 | 1670696 | KKKKKADETQALPQRQK                                      | D377Y, R385K | B.1.617.2 | microarray           | [3]   |
| 373-387 | 1312850 | KKKADETQALPQRQK                                        | D377Y, R385K | B.1.617.2 | microarray           | [1,8] |
| 373-388 | 1670695 | KKKADETQALPQRQKK                                       | D377Y, R385K | B.1.617.2 | microarray           | [3]   |
| 374-388 | 1541021 | KKKADETQALPQRQKK                                       | D377Y, R385K | B.1.617.2 | ELISA                | [7]   |
| 374-389 | 1670626 | KKKADETQALPQRQKKQ                                      | D377Y, R385K | B.1.617.2 | microarray           | [3]   |
| 375-390 | 1669082 | KADETQALPQRQKKQQ                                       | D377Y, R385K | B.1.617.2 | microarray           | [3]   |
| 376-390 | 1310054 | ADETQALPQRQKKQQ                                        | D377Y, R385K | B.1.617.2 | microarray           | [1]   |
| 376-391 | 1377343 | ADETQALPQRQKKQQT                                       | D377Y, R385K | B.1.617.2 | microarray           | [3]   |
| 376-397 | 1377344 | ADETQALPQRQKKQQTVTLLP                                  | D377Y, R385K | B.1.617.2 | microarray           | [3]   |

|         |         |                                       |              |           |                                    |        |
|---------|---------|---------------------------------------|--------------|-----------|------------------------------------|--------|
| 376-400 | 1407393 | ADETQALPQRQKKQQTVTLLP<br>AADL         | D377Y, R385K | B.1.617.2 | microarray                         | [6]    |
| 377-387 | 1339955 | DETQALPQRQK                           | D377Y, R385K | B.1.617.2 | microarray                         | [8]    |
| 377-388 | 1420342 | DETQALPQRQKK                          | D377Y, R385K | B.1.617.2 | immunoprecipitation,<br>microarray | [6,16] |
| 377-391 | 1312288 | DETQALPQRQKKQQT                       | D377Y, R385K | B.1.617.2 | microarray                         | [8]    |
| 377-392 | 1378502 | DETQALPQRQKKQQT                       | D377Y, R385K | B.1.617.2 | microarray                         | [16]   |
| 378-393 | 1380089 | ETQALPQRQKKQQT                        | R385K        | B.1.617.2 | microarray                         | [3]    |
| 379-393 | 2001340 | TQALPQRQKKQQT                         | R385K        | B.1.617.2 | microarray                         | [1]    |
| 379-394 | 1389884 | TQALPQRQKKQQT                         | R385K        | B.1.617.2 | microarray                         | [3]    |
| 379-419 | 1862941 | TQALPQRQKKQQT<br>LDDFSKQLQQSMSSADSTQA | R385K        | B.1.617.2 | ELISA,<br>immunostaining           | [17]   |
| 380-395 | 1386999 | QALPQRQKKQQT                          | R385K        | B.1.617.2 | microarray                         | [3]    |
| 381-395 | 1310061 | ALPQRQKKQQT                           | R385K        | B.1.617.2 | microarray                         | [2,18] |
| 381-396 | 1377653 | ALPQRQKKQQT                           | R385K        | B.1.617.2 | microarray                         | [3]    |
| 381-419 | 1334453 | ALPQRQKKQQT<br>DFSKQLQQSMSSADSTQA     | R385K        | B.1.617.2 | phage display,<br>western blot     | [5,19] |
| 382-397 | 1384883 | LPQRQKKQQT                            | R385K        | B.1.617.2 | microarray,<br>western blot        | [3,20] |
| 382-396 | 1541442 | LPQRQKKQQT                            | R385K        | B.1.617.2 | ELISA,<br>microarray               | [1,7]  |
| 382-405 | 1311750 | LPQRQKKQQT<br>FSK                     | R385K        | B.1.617.2 | microarray                         | [13]   |
| 383-398 | 1686384 | PQRQKKQQT                             | R385K        | B.1.617.2 | microarray                         | [3]    |
| 384-398 | 1542180 | QRQKKQQT                              | R385K        | B.1.617.2 | ELISA                              | [7]    |
| 384-399 | 1387379 | QRQKKQQT                              | R385K        | B.1.617.2 | microarray                         | [3]    |
| 384-416 | 1387381 | QRQKKQQT<br>KQLQQSMSSADS              | R385K        | B.1.617.2 | microarray                         | [3]    |
| 385-396 | 1499582 | RQKKQQT                               | R385K        | B.1.617.2 | immunoprecipitation                | [16]   |
| 385-399 | 1313484 | RQKKQQT                               | R385K        | B.1.617.2 | microarray                         | [1,8]  |
| 385-400 | 1387865 | RQKKQQT                               | R385K        | B.1.617.2 | microarray                         | [3]    |

**Table S3.** List of variable T-cell epitopes of N protein of SARS-CoV-2 with confirmed binding to HLA molecules.

| Position | IEDB ID | Epitope sequence  | Mutation   | Strain             | Allele                   | Method                       | Reference |
|----------|---------|-------------------|------------|--------------------|--------------------------|------------------------------|-----------|
| 1-15     | 1313173 | MSDNGPQNQRNAPRI   | P13S, P13L | B.1.351, B.1.1.529 | HLA class II             | ICS IFN $\gamma$ release     | [21]      |
| 1-17     | 1309131 | MSDNGPQNQRNAPRITF | P13S, P13L | B.1.351, B.1.1.529 | HLA-B*27:05, HLA-B*27:06 | ELISPOT IFN $\gamma$ release | [22]      |
| 5-17     | 1317715 | GPQNQRNAPRITF     | P13S, P13L | B.1.351, B.1.1.529 | HLA-B*07:02              | activation                   | [23]      |



|         |         |                     |               |                                         |                                                             |                                                               |              |
|---------|---------|---------------------|---------------|-----------------------------------------|-------------------------------------------------------------|---------------------------------------------------------------|--------------|
| 6-20    | 1323019 | PQNQRNAPRITFGGP     | P13S,<br>P13L | B.1.351,<br>B.1.1.529                   | HLA class II                                                | ICS IFN $\gamma$ release, activation                          | [21,23]      |
| 8-25    | 1309133 | NQRNAPRITFGGPSDSTG  | P13S,<br>P13L | B.1.351,<br>B.1.1.529                   | HLA-B*27:05,<br>HLA-B*27:06                                 | ELISPOT IFN $\gamma$ release                                  | [22]         |
| 9-17    | 1309136 | QRNAPRITF           | P13S,<br>P13L | B.1.351,<br>B.1.1.529                   | HLA-B*27:05,<br>HLA-C*07:01                                 | ELISPOT IFN $\gamma$ release, qualitative binding, activation | [24–26]      |
| 9-27    | 1494865 | QRNAPRITFGGPSDSTGSN | P13S,<br>P13L | B.1.351,<br>B.1.1.529                   | HLA class II                                                | ELISA IFN $\gamma$ release                                    | [27]         |
| 11-25   | 1322297 | NAPRITFGGPSDSTG     | P13S,<br>P13L | B.1.351,<br>B.1.1.529                   | HLA-DQB1*03:01                                              | ICS IFN $\gamma$ release, activation                          | [23]         |
| 12-20   | 1330992 | APRITFGGP           | P13S,<br>P13L | B.1.351,<br>B.1.1.529                   | HLA-A*02:01,<br>HLA-B*07:02                                 | qualitative binding                                           | [28]         |
| 17-31   | 1312422 | FGGPSDSTGSNQNGE     | E31 del       | B.1.1.529                               | HLA class II                                                | ELISPOT IFN $\gamma$ release                                  | [29]         |
| 21-35   | 1313538 | SDSTGSNQNGERSGA     | ERS31-33 del  | B.1.1.529                               | HLA class II                                                | ICS IFN $\gamma$ release                                      | [21]         |
| 26-40   | 1542535 | SNQNGERSGARSKQR     | ERS31-33 del  | B.1.1.529                               | HLA class II                                                | ICS IFN $\gamma$ release                                      | [21]         |
| 31-45   | 1397276 | ERSGARSKQRRPQGL     | ERS31-33 del  | B.1.1.529                               | HLA class II                                                | ICS IFN $\gamma$ release                                      | [21]         |
|         |         | LPNNTASWFTALTQHGKE  |               | B.1.617.2                               |                                                             | ELISA IFN $\gamma$ release                                    | [27]         |
| 45-63   | 1470968 | D                   | D63G          | B.1.617.2                               | HLA class II                                                | qualitative binding                                           | [27]         |
|         |         | TASWFTALTQHGKEDLKF  |               |                                         | HLA-DRB1*04:01,<br>HLA-DRB5*01:01                           |                                                               |              |
| 49-68   | 1869725 | PR                  | D63G          | B.1.617.2                               | HLA-DRB4*01:03                                              | ELISPOT IFN $\gamma$ release                                  | [30,31]      |
| 50-64   | 1310292 | ASWFTALTQHGKEDL     | D63G          | B.1.617.2                               |                                                             | ICS IFN $\gamma$ release, activation                          | [21,23]      |
| 51-65   | 1172352 | SWFTALTQHGKEDLK     | D63G          |                                         | HLA-DRB                                                     | activation                                                    | [23]         |
| 56-70   | 1321406 | LTQHKGEDLKFPGRGQ    | D63G          | B.1.617.2                               | HLA class II                                                | activation                                                    | [21]         |
| 63-75   | 1312809 | KEDLKFPRGQGVPIIN    | D63G          | B.1.617.2                               | HLA class II                                                | ICS IFN $\gamma$ release                                      | [21]         |
|         |         |                     |               | P.1                                     |                                                             | ICS IFN $\gamma$ release, activation                          | [21,23]      |
| 66-80   | 1316855 | FPRGQGVPIINTNSSP    | P80R          | P.1                                     | HLA class II                                                | ICS IFN $\gamma$ release, activation                          | [21,23]      |
| 71-85   | 1317881 | GVPINTNSSPDDQIG     | P80R          | P.1                                     | HLA class II                                                | qualitative binding, activation                               | [23,32]      |
| 75-87   | 1075010 | NTNSSPDDQIGYY       | P80R          |                                         | HLA-A*01:01                                                 | activation                                                    |              |
| 76-90   | 1542862 | TNSSPDDQIGYYRRA     | P80R          | P.1                                     | HLA class II                                                | ICS IFN $\gamma$ release                                      | [21]         |
| 77-87   | 1541833 | NSSPDDQIGYY         | P80R          | P.1                                     | HLA-A*01:01                                                 | qualitative binding                                           | [33]         |
| 78-87   | 1542585 | SSPDDQIGYY          | P80R          | P.1                                     | HLA class I,<br>HLA-B*35:02,<br>HLA-B*35:01,<br>HLA-C*04:01 | ELISA IFN $\gamma$ release                                    | [30]         |
| 78-88   | 1333792 | SSPDDQIGYYR         | P80R          | P.1                                     | HLA-A*01:01                                                 | qualitative binding                                           | [25]         |
| 79-87   | 1310816 | SPDDQIGYY           | D63G          | B.1.617.2<br>B.1.351,<br>R203K<br>G204R | HLA-B*35:01                                                 | activation<br>ICS IFN $\gamma$ release                        | [23]<br>[21] |
| 191-205 | 1597796 | RNSSRNSTPGSSKRT     | T205I         | B.1.1.529                               | HLA class II                                                |                                                               |              |

|                |                    |                 |                                    |                    |  |                            |      |
|----------------|--------------------|-----------------|------------------------------------|--------------------|--|----------------------------|------|
|                |                    |                 | B.1.351,<br>R203K<br>P.1,<br>G204R |                    |  | ICS IFN $\gamma$ release   | [21] |
| 196-2101597775 | NSTPGSSKRTSPARM    | T205I           | B.1.617.2,<br>B.1.1.529            | HLA class II       |  |                            |      |
|                |                    |                 | B.1.351,<br>R203K<br>P.1,<br>G204R |                    |  | activation                 | [34] |
| 201-2091075062 | SSRGTSPAR          | T205I           | B.1.617.2,<br>B.1.1.529            | HLA class I        |  |                            |      |
|                |                    | R203K           | B.1.351,<br>P.1,<br>G204R          |                    |  | ICS IFN $\gamma$ release   | [21] |
| 201-2151597811 | SSKRTSPARMAGNGG    | G215C           | B.1.617.2,<br>B.1.1.529            | HLA class II       |  |                            |      |
| 206-2201542543 | SPARMAGNGGDAALA    | G215C           | B.1.617.2                          | HLA class II       |  | ICS IFN $\gamma$ release   | [21] |
| 209-2231313463 | RMAGNGGDAALALLL    | G215C           | B.1.617.2                          | HLA class II       |  | ELISA IFN $\gamma$ release | [27] |
|                | RMAGNGGDAALALLLD   |                 | B.1.617.2                          |                    |  | ELISA IFN $\gamma$ release | [27] |
| 209-2271498997 | RL                 | G215C           |                                    | HLA class II       |  |                            |      |
|                |                    |                 | B.1.617.2                          |                    |  | ICS IFN $\gamma$ release,  | [27] |
| 211-2251314288 | AGNGGDAALALLLD     | G215C           |                                    | HLA-DRB            |  | activation                 |      |
| 215-2232134089 | GDAALALLL          | G215C           | B.1.617.2                          | HLA-A*02:01        |  | qualitative binding        | [35] |
| 366-3791310210 | TEPKKDKKKKADETQ    | D377Y           | B.1.617.2                          | HLA class II       |  | ICS IFN $\gamma$ release   | [21] |
| 371-3851310080 | DKKKKADETQALPQR    | D377Y,<br>R385K | B.1.617.2                          | HLA class II       |  | ICS IFN $\gamma$ release   | [21] |
| 376-3901310054 | ADETQALPQRQKKQQ    | D377Y,<br>R385K | B.1.617.2                          | HLA class II       |  | ICS IFN $\gamma$ release   | [21] |
| 381-3951310061 | ALPQRQKKQQTVTLL    | R385K           | B.1.617.2                          | HLA class II       |  | ICS IFN $\gamma$ release   | [21] |
| 385-4041868935 | RQKKQQTVTLLPAADLDD | R385K           | B.1.617.2                          | HLA-<br>DRB1*01:01 |  | qualitative binding        | [36] |
|                | FS                 |                 |                                    |                    |  |                            |      |

## References

- Hotop, S.-K.; Reimering, S.; Shekhar, A.; Asgari, E.; Beutling, U.; Dahlke, C.; Fathi, A.; Khan, F.; Lütgehetmann, M.; Ballmann, R.; et al. Peptide Microarrays Coupled to Machine Learning Reveal Individual Epitopes from Human Antibody Responses with Neutralizing Capabilities against SARS-CoV-2. *Emerging Microbes & Infections* **2022**, *11*, 1037–1048, doi:10.1080/22221751.2022.2057874.
- Voss, C.; Esmail, S.; Liu, X.; Knauer, M.J.; Ackloo, S.; Kaneko, T.; Lowes, L.; Stogios, P.; Seitova, A.; Hutchinson, A.; et al. Epitope-Specific Antibody Responses Differentiate COVID-19 Outcomes and Variants of Concern. *JCI Insight* **2021**, *6*, e148855, doi:10.1172/jci.insight.148855.
- Heffron, A.S.; McIlwain, S.J.; Amjadi, M.F.; Baker, D.A.; Khullar, S.; Sethi, A.K.; Palmenberg, A.C.; Shelef, M.A.; O'Connor, D.H.; Ong, I.M. *The Landscape of Antibody Binding in SARS-CoV-2 Infection*; Immunology, 2020;
- Gregory, D.J.; Vannier, A.; Duey, A.H.; Roady, T.J.; Dzeng, R.K.; Pavlovic, M.N.; Chapin, M.H.; Mukherjee, S.; Wilmot, H.; Chronos, N.; et al. Repertoires of SARS-CoV-2 Epitopes Targeted by Antibodies Vary According to Severity of COVID-19. *Virulence* **2022**, *13*, 890–902, doi:10.1080/21505594.2022.2073025.
- Stoddard, C.I.; Galloway, J.; Chu, H.Y.; Shipley, M.M.; Sung, K.; Itell, H.L.; Wolf, C.R.; Logue, J.K.; Magedson, A.; Garrett, M.E.; et al. Epitope Profiling Reveals Binding Signatures of SARS-CoV-2 Immune Response in Natural Infection and Cross-Reactivity with Endemic Human CoVs. *Cell Reports* **2021**, *35*, 109164, doi:10.1016/j.celrep.2021.109164.
- Mishra, N.; Huang, X.; Joshi, S.; Guo, C.; Ng, J.; Thakkar, R.; Wu, Y.; Dong, X.; Li, Q.; Pinapati, R.S.; et al. Immunoreactive Peptide Maps of SARS-CoV-2. *Commun Biol* **2021**, *4*, 225, doi:10.1038/s42003-021-01743-9.
- Schwarz, T.; Heiss, K.; Mahendran, Y.; Casilag, F.; Kurth, F.; Sander, L.E.; Wendtner, C.-M.; Hoechstetter, M.A.; Müller, M.A.; Sekul, R.; et al. SARS-CoV-2 Proteome-Wide Analysis Revealed Significant Epitope Signatures in COVID-19 Patients. *Front. Immunol.* **2021**, *12*, 629185, doi:10.3389/fimmu.2021.629185.

8. Holenya, P.; Lange, P.J.; Reimer, U.; Woltersdorf, W.; Panterodt, T.; Glas, M.; Wasner, M.; Eckey, M.; Drosch, M.; Hollidt, J.; et al. Peptide Microarray-based Analysis of Antibody Responses to SARS-CoV-2 Identifies Unique Epitopes with Potential for Diagnostic Test Development. *Eur. J. Immunol.* **2021**, *51*, 1839–1849, doi:10.1002/eji.202049101.
9. Yu, J.; Qin, Z.; Liu, X.; He, X.; Yao, J.; Zhou, X.; Wen, K.; Yu, N.; Wu, Q.; Xiao, W.; et al. High-Specificity Targets in SARS-CoV-2 N Protein for Serological Detection and Distinction from SARS-CoV. *Computers in Biology and Medicine* **2022**, *143*, 105272, doi:10.1016/j.combiomed.2022.105272.
10. Kumar, G.; Sterrett, S.; Hall, L.; Tabengwa, E.; Honjo, K.; Larimer, M.; Davis, R.S.; Goepfert, P.A.; Larimer, B.M. Comprehensive Mapping of SARS-CoV-2 Peptide Epitopes for Development of a Highly Sensitive Serological Test for Total and Neutralizing Antibodies. *Protein Engineering, Design and Selection* **2022**, *35*, gzab033, doi:10.1093/protein/gzab033.
11. Garanina, E.; Hamza, S.; Stott-Marshall, R.J.; Martynova, E.; Markelova, M.; Davidyuk, Y.; Shakirova, V.; Kaushal, N.; Baranwal, M.; Khaertynova, I.M.; et al. Antibody and T Cell Immune Responses to SARS-CoV-2 Peptides in COVID-19 Convalescent Patients. *Front. Microbiol.* **2022**, *13*, 842232, doi:10.3389/fmicb.2022.842232.
12. Lu, S.; Xie, X.; Zhao, L.; Wang, B.; Zhu, J.; Yang, T.; Yang, G.; Ji, M.; Lv, C.; Xue, J.; et al. The Immunodominant and Neutralization Linear Epitopes for SARS-CoV-2. *Cell Reports* **2021**, *34*, 108666, doi:10.1016/j.celrep.2020.108666.
13. Shrock, E.; Fujimura, E.; Kula, T.; Timms, R.T.; Lee, I.-H.; Leng, Y.; Robinson, M.L.; Sie, B.M.; Li, M.Z.; Chen, Y.; et al. Viral Epitope Profiling of COVID-19 Patients Reveals Cross-Reactivity and Correlates of Severity. *Science* **2020**, *370*, eabd4250, doi:10.1126/science.abd4250.
14. Amrun, S.N.; Lee, C.Y.-P.; Lee, B.; Fong, S.-W.; Young, B.E.; Chee, R.S.-L.; Yeo, N.K.-W.; Torres-Ruesta, A.; Carissimo, G.; Poh, C.M.; et al. Linear B-Cell Epitopes in the Spike and Nucleocapsid Proteins as Markers of SARS-CoV-2 Exposure and Disease Severity. *EBioMedicine* **2020**, *58*, 102911, doi:10.1016/j.ebiom.2020.102911.
15. Herrscher, C.; Eymieux, S.; Gaborit, C.; Blasco, H.; Marlet, J.; Stefic, K.; Roingeard, P.; Grammatico-Guillon, L.; Hourieux, C. ELISA-Based Analysis Reveals an Anti-SARS-CoV-2 Protein Immune Response Profile Associated with Disease Severity. *JCM* **2022**, *11*, 405, doi:10.3390/jcm11020405.
16. Haynes, W.A.; Kamath, K.; Bozekowski, J.; Baum-Jones, E.; Campbell, M.; Casanovas-Massana, A.; Daugherty, P.S.; Dela Cruz, C.S.; Dhal, A.; Farhadian, S.F.; et al. High-Resolution Epitope Mapping and Characterization of SARS-CoV-2 Antibodies in Large Cohorts of Subjects with COVID-19. *Commun Biol* **2021**, *4*, 1317, doi:10.1038/s42003-021-02835-2.
17. Tian, Y.; Zhang, G.; Liu, H.; Ding, P.; Jia, R.; Zhou, J.; Chen, Y.; Qi, Y.; Du, J.; Liang, C.; et al. Screening and Identification of B Cell Epitope of the Nucleocapsid Protein in SARS-CoV-2 Using the Monoclonal Antibodies. *Appl Microbiol Biotechnol* **2022**, *106*, 1151–1164, doi:10.1007/s00253-022-11769-6.
18. Yang, L.; Liang, T.; Pierson, L.M.; Wang, H.; Fletcher, J.K.; Wang, S.; Bao, D.; Zhang, L.; Huang, Z.; Zheng, W.; et al. SARS-CoV-2 Epitopes Following Infection and Vaccination Overlap Known Neutralizing Antibody Sites. *Research* **2022**, *2022*, 1–14, doi:10.34133/2022/9769803.
19. Terry, J.S.; Anderson, L.B.R.; Scherman, M.S.; McAlister, C.E.; Perera, R.; Schountz, T.; Geiss, B.J. Development of a SARS-CoV-2 Nucleocapsid Specific Monoclonal Antibody. *Virology* **2021**, *558*, 28–37, doi:10.1016/j.virol.2021.01.003.
20. Yamaoka, Y.; Miyakawa, K.; Jeremiah, S.S.; Funabashi, R.; Okudela, K.; Kikuchi, S.; Katada, J.; Wada, A.; Takei, T.; Nishi, M.; et al. Highly Specific Monoclonal Antibodies and Epitope Identification against SARS-CoV-2 Nucleocapsid Protein for Antigen Detection Tests. *Cell Reports Medicine* **2021**, *2*, 100311, doi:10.1016/j.xcrm.2021.100311.
21. Heide, J.; Schulte, S.; Kohsar, M.; Brehm, T.T.; Herrmann, M.; Karsten, H.; Marget, M.; Peine, S.; Johansson, A.M.; Sette, A.; et al. Broadly Directed SARS-CoV-2-Specific CD4+ T Cell Response Includes Frequently Detected Peptide Specificities within the Membrane and Nucleoprotein in Patients with Acute and Resolved COVID-19. *PLoS Pathog* **2021**, *17*, e1009842, doi:10.1371/journal.ppat.1009842.
22. Peng, Y.; Mentzer, A.J.; Liu, G.; Yao, X.; Yin, Z.; Dong, D.; Dejnirattisai, W.; Rostron, T.; Supasa, P.; Liu, C.; et al. Broad and Strong Memory CD4+ and CD8+ T Cells Induced by SARS-CoV-2 in UK Convalescent Individuals Following COVID-19. *Nat Immunol* **2020**, *21*, 1336–1345, doi:10.1038/s41590-020-0782-6.

23. Tarke, A.; Sidney, J.; Kidd, C.K.; Dan, J.M.; Ramirez, S.I.; Yu, E.D.; Mateus, J.; da Silva Antunes, R.; Moore, E.; Rubiro, P.; et al. Comprehensive Analysis of T Cell Immunodominance and Immunoprevalence of SARS-CoV-2 Epitopes in COVID-19 Cases. *Cell Reports Medicine* **2021**, *2*, 100204, doi:10.1016/j.xcrm.2021.100204.
24. van den Dijssel, J.; Hagen, R.R.; de Jongh, R.; Steenhuis, M.; Rispens, T.; Geerdes, D.M.; Mok, J.Y.; Kragten, A.H.; Duurland, M.C.; Verstegen, N.J.; et al. Parallel Detection of SARS-CoV -2 Epitopes Reveals Dynamic Immunodominance Profiles of CD8<sup>+</sup> T Memory Cells in Convalescent COVID -19 Donors. *Clin & Trans Imm* **2022**, *11*, doi:10.1002/cti2.1423.
25. Saini, S.K.; Hersby, D.S.; Tamhane, T.; Povlsen, H.R.; Hernandez, S.P.A.; Nielsen, M.; Gang, A.O.; Hadrup, S.R. SARS-CoV-2 Genome-Wide T Cell Epitope Mapping Reveals Immunodominance and Substantial CD8<sup>+</sup> T Cell Activation in COVID-19 Patients. *Sci. Immunol.* **2021**, *6*, eabf7550, doi:10.1126/sciimmunol.abf7550.
26. de Silva, T.I.; Liu, G.; Lindsey, B.B.; Dong, D.; Moore, S.C.; Hsu, N.S.; Shah, D.; Wellington, D.; Mentzer, A.J.; Angyal, A.; et al. The Impact of Viral Mutations on Recognition by SARS-CoV-2 Specific T Cells. *iScience* **2021**, *24*, 103353, doi:10.1016/j.isci.2021.103353.
27. Verhagen, J.; van der Meijden, E.D.; Lang, V.; Kremer, A.E.; Völkl, S.; Mackensen, A.; Aigner, M.; Kremer, A.N. Human CD4<sup>+</sup> T Cells Specific for Dominant Epitopes of SARS-CoV-2 Spike and Nucleocapsid Proteins with Therapeutic Potential. *Clinical and Experimental Immunology* **2021**, *205*, 363–378, doi:10.1111/cei.13627.
28. Weingarten-Gabbay, S.; Klaeger, S.; Sarkizova, S.; Pearlman, L.R.; Chen, D.-Y.; Gallagher, K.M.E.; Bauer, M.R.; Taylor, H.B.; Dunn, W.A.; Tarr, C.; et al. Profiling SARS-CoV-2 HLA-I Peptidome Reveals T Cell Epitopes from out-of-Frame ORFs. *Cell* **2021**, *184*, 3962–3980.e17, doi:10.1016/j.cell.2021.05.046.
29. Lin, J.; Law, R.; Korosec, C.S.; Zhou, C.; Koh, W.H.; Ghaemi, M.S.; Samaan, P.; Ooi, H.K.; Matveev, V.; Yue, F.; et al. Longitudinal Assessment of SARS-CoV-2-Specific T Cell Cytokine-Producing Responses for 1 Year Reveals Persistence of Multicytokine Proliferative Responses, with Greater Immunity Associated with Disease Severity. *J Virol* **2022**, *96*, e00509-22, doi:10.1128/jvi.00509-22.
30. Titov, A.; Shaykhutdinova, R.; Shcherbakova, O.V.; Serdyuk, Y.V.; Sheetikov, S.A.; Zornikova, K.V.; Maleeva, A.V.; Khmelevskaya, A.; Dianov, D.V.; Shakirova, N.T.; et al. Immunogenic Epitope Panel for Accurate Detection of Non-Cross-Reactive T Cell Response to SARS-CoV-2. *JCI Insight* **2022**, *7*, e157699, doi:10.1172/jci.insight.157699.
31. Heitmann, J.S.; Bilich, T.; Tandler, C.; Nelde, A.; Maringer, Y.; Marconato, M.; Reusch, J.; Jäger, S.; Denk, M.; Richter, M.; et al. A COVID-19 Peptide Vaccine for the Induction of SARS-CoV-2 T Cell Immunity. *Nature* **2022**, *601*, 617–622, doi:10.1038/s41586-021-04232-5.
32. Minervina, A.A.; Pogorelyy, M.V.; Kirk, A.M.; Crawford, J.C.; Allen, E.K.; Chou, C.-H.; Mettelman, R.C.; Allison, K.J.; Lin, C.-Y.; Brice, D.C.; et al. SARS-CoV-2 Antigen Exposure History Shapes Phenotypes and Specificity of Memory CD8<sup>+</sup> T Cells. *Nat Immunol* **2022**, *23*, 781–790, doi:10.1038/s41590-022-01184-4.
33. Nagler, A.; Kalaora, S.; Barbolin, C.; Gangaev, A.; Ketelaars, S.L.C.; Alon, M.; Pai, J.; Benedek, G.; Yahalom-Ronen, Y.; Erez, N.; et al. Identification of Presented SARS-CoV-2 HLA Class I and HLA Class II Peptides Using HLA Peptidomics. *Cell Reports* **2021**, *35*, 109305, doi:10.1016/j.celrep.2021.109305.
34. Snyder, T.M.; Gittelman, R.M.; Klinger, M.; May, D.H.; Osborne, E.J.; Taniguchi, R.; Zahid, H.J.; Kaplan, I.M.; Dines, J.N.; Noakes, M.T.; et al. *Magnitude and Dynamics of the T-Cell Response to SARS-CoV-2 Infection at Both Individual and Population Levels*; Infectious Diseases (except HIV/AIDS), 2020;
35. Jm, F.; D, L.-E.; A, D.; C, T.; J, L.; C, D.; A, H.; V, R.; G, L.; Y, W.; et al. Allelic Variation in Class I HLA Determines CD8<sup>+</sup> T Cell Repertoire Shape and Cross-Reactive Memory Responses to SARS-CoV-2. *Science immunology* **2022**, *7*, doi:10.1126/sciimmunol.abk3070.
36. Johansson, A.M.; Malhotra, U.; Kim, Y.G.; Gomez, R.; Krist, M.P.; Wald, A.; Koelle, D.M.; Kwok, W.W. Cross-Reactive and Mono-Reactive SARS-CoV-2 CD4<sup>+</sup> T Cells in Prepandemic and COVID-19 Convalescent Individuals. *PLoS Pathog* **2021**, *17*, e1010203, doi:10.1371/journal.ppat.1010203.
